# Supplementary material for: Two new rare-earth borates Sr2Tb3B27−δO46 and Ba2Eu3B27−δO46 (δ = 2/3): syntheses, crystal structures, and luminescence properties
Source: Royal Society of Chemistry journal article supplement (doi:10.1039/d1dt04257b), 2022-01-01
Supplement: d1dt04257b1.pdf [file d1dt04257b1.pdf]

## Supporting Information

# Two new rare-earth borates $\text{Sr}_2\text{Tb}_3\text{B}_{27-\delta}\text{O}_{46}$ and $\text{Ba}_2\text{Eu}_3\text{B}_{27-\delta}\text{O}_{46}$ ( $\delta = 2/3$ ): Syntheses, crystal structures, and luminescent properties

Xuean Chen<sup>a,\*</sup>, Jinyuan Zhang<sup>a</sup>, Weiqiang Xiao<sup>b</sup>, and Xiaoyan Song<sup>a</sup>

<sup>a</sup>Faculty of Materials and Manufacturing, Key Laboratory of Advanced Functional Materials, Ministry of Education of China, Beijing University of Technology, 100124 Beijing, China. E-mail: [xueanchen@bjut.edu.cn](mailto:xueanchen@bjut.edu.cn)

<sup>b</sup>Beijing Key Laboratory of Microstructure and Property of Solids, Beijing University of Technology, 100124 Beijing, China

## Content

- Table S1** Atomic coordinates, site occupancies, and equivalent isotropic displacement parameters ( $\text{\AA}^2$ ) for  $\text{Sr}_2\text{Tb}_3\text{B}_{27-\delta}\text{O}_{46}$  and  $\text{Ba}_2\text{Eu}_3\text{B}_{27-\delta}\text{O}_{46}$  ( $\delta = 2/3$ ).
- Table S2** Selected bond lengths ( $\text{\AA}$ ) for  $\text{Sr}_2\text{Tb}_3\text{B}_{27-\delta}\text{O}_{46}$  ( $\delta = 2/3$ ).
- Table S3** Selected bond angles ( $^\circ$ ) for  $\text{Sr}_2\text{Tb}_3\text{B}_{27-\delta}\text{O}_{46}$  ( $\delta = 2/3$ ).
- Table S4** Selected bond lengths ( $\text{\AA}$ ) for  $\text{Ba}_2\text{Eu}_3\text{B}_{27-\delta}\text{O}_{46}$  ( $\delta = 2/3$ ).
- Table S5** Selected bond angles ( $^\circ$ ) for  $\text{Ba}_2\text{Eu}_3\text{B}_{27-\delta}\text{O}_{46}$  ( $\delta = 2/3$ ).
- Table S6** SHG intensities of the  $\text{Sr}_2\text{Tb}_3\text{B}_{27-\delta}\text{O}_{46}$  and  $\text{Ba}_2\text{Eu}_3\text{B}_{27-\delta}\text{O}_{46}$  ( $\delta = 2/3$ ) samples compared with the KDP reference.
- Fig. S1** Crystal structure of  $\text{Ba}_6\text{Bi}_9\text{B}_{79}\text{O}_{138}$  projected along the [100] direction (a), the  $[\text{B}_{27}\text{O}_{58}]^{35-}$  polyborate anionic group (b), a single layer  $[\text{B}_{27}\text{O}_{46}]_n^{11n-}$  viewed along the [001] direction (c), and the local environment of each  $\text{Ba}^{2+}$  and  $\text{Bi}^{3+}$  site (the numbers correspond to the oxygen atom designations) (d).
- Fig. S2** Comparison of the observed XRD pattern of  $\text{Ba}_2\text{Eu}_3\text{B}_{27-\delta}\text{O}_{46}$  ( $\delta = 2/3$ ) (presented in this work) with that of “ $\text{BaEuB}_9\text{O}_{16}$ ” (cited from ref. 21).
- Fig. S3** XRD patterns of  $\text{Sr}_2\text{Tb}_3\text{B}_{27-\delta}\text{O}_{46}$  ( $\delta = 2/3$ ) under different temperatures.
- Fig. S4** XRD patterns of  $\text{Ba}_2\text{Eu}_3\text{B}_{27-\delta}\text{O}_{46}$  ( $\delta = 2/3$ ) under different temperatures.
- Fig. S5** FE-SEM images, typical EDX spectra, and elemental mapping of the  $\text{Sr}_2\text{Tb}_3\text{B}_{27-\delta}\text{O}_{46}$  (a) and  $\text{Ba}_2\text{Eu}_3\text{B}_{27-\delta}\text{O}_{46}$  (b) crystals.
- Fig. S6** Survey (a) and core-level spectra of Sr 3d (b), Ba 3d (c), Tb 3d (d), Eu 3d (e) B 1s (f), and O 1s (g) for  $\text{Sr}_2\text{Tb}_3\text{B}_{27-\delta}\text{O}_{46}$  (top) and  $\text{Ba}_2\text{Eu}_3\text{B}_{27-\delta}\text{O}_{46}$  (bottom).

**Table S1** Atomic coordinates, site occupancies, and equivalent isotropic displacement parameters ( $\text{\AA}^2$ ) for  $\text{Sr}_2\text{Tb}_3\text{B}_{27-\delta}\text{O}_{46}$  and  $\text{Ba}_2\text{Eu}_3\text{B}_{27-\delta}\text{O}_{46}$  ( $\delta = 2/3$ ).

| Atoms                                                     | Wyck sites | Site symmetry | X           | Y           | Z            | Occupancies | $U_{\text{eq}}$ |
|-----------------------------------------------------------|------------|---------------|-------------|-------------|--------------|-------------|-----------------|
| $\text{Sr}_2\text{Tb}_3\text{B}_{27-\delta}\text{O}_{46}$ |            |               |             |             |              |             |                 |
| Sr1                                                       | 3a         | $C_3$         | 0.0000      | 0.0000      | 0.07410(9)   | 1           | 0.0253(3)       |
| Sr2                                                       | 3a         | $C_3$         | 0.0000      | 0.0000      | 0.92588(9)   | 1           | 0.0257(3)       |
| Tb1                                                       | 3a         | $C_3$         | 0.0000      | 0.0000      | 0.166330(16) | 1           | 0.00938(11)     |
| Tb2                                                       | 3a         | $C_3$         | 0.0000      | 0.0000      | 0.834530(11) | 1           | 0.0095(2)       |
| Tb3                                                       | 3a         | $C_3$         | 0.0000      | 0.0000      | 0.498865(14) | 1           | 0.00849(17)     |
| B1                                                        | 9b         | $C_1$         | -0.3358(13) | 0.0012(13)  | 0.8771(5)    | 1           | 0.0116(12)      |
| B2                                                        | 9b         | $C_1$         | 0.3370(13)  | -0.0013(13) | 0.8771(5)    | 1           | 0.0112(13)      |
| B3                                                        | 9b         | $C_1$         | -0.0007(13) | -0.3369(14) | 0.1228(6)    | 1           | 0.0134(13)      |
| B4                                                        | 9b         | $C_1$         | -0.3367(15) | -0.3385(13) | 0.1228(6)    | 1           | 0.0141(13)      |
| B5                                                        | 9b         | $C_1$         | -0.4983(16) | 0.0003(17)  | 0.9221(2)    | 1           | 0.0164(11)      |
| B6                                                        | 9b         | $C_1$         | -0.0041(18) | -0.5011(17) | 0.0775(2)    | 1           | 0.0180(11)      |
| B7                                                        | 9b         | $C_1$         | -0.399(2)   | 0.009(2)    | 0.9737(3)    | 1           | 0.0339(16)      |
| B8                                                        | 9b         | $C_1$         | -0.012(2)   | -0.412(2)   | 0.0258(3)    | 1           | 0.0332(15)      |
| B9                                                        | 9b         | $C_1$         | -0.148(2)   | 0.0000      | 0.0012(3)    | 7/9         | 0.0316(16)      |
| O1                                                        | 3a         | $C_3$         | 0.0000      | 0.0000      | -0.0067(3)   | 1           | 0.0296(12)      |
| O2                                                        | 9b         | $C_1$         | -0.0025(9)  | -0.3475(10) | 0.0913(3)    | 1           | 0.0145(11)      |
| O3                                                        | 9b         | $C_1$         | 0.3444(9)   | -0.0018(9)  | 0.9085(3)    | 1           | 0.0141(11)      |
| O4                                                        | 9b         | $C_1$         | -0.3480(10) | -0.0016(9)  | 0.9083(3)    | 1           | 0.0144(11)      |
| O5                                                        | 9b         | $C_1$         | -0.3452(10) | -0.3455(9)  | 0.0912(3)    | 1           | 0.0133(11)      |
| O6                                                        | 9b         | $C_1$         | -0.1327(8)  | -0.2651(8)  | 0.53072(11)  | 1           | 0.0100(9)       |
| O7                                                        | 9b         | $C_1$         | -0.1299(9)  | 0.1276(9)   | 0.86793(11)  | 1           | 0.0137(9)       |
| O8                                                        | 9b         | $C_1$         | -0.5278(13) | -0.0514(12) | 0.9999(2)    | 1           | 0.0421(15)      |
| O9                                                        | 9b         | $C_1$         | -0.3980(8)  | -0.1991(8)  | 0.86490(11)  | 1           | 0.0122(8)       |
| O10                                                       | 9b         | $C_1$         | 0.0274(13)  | -0.4886(13) | 0.04801(19)  | 1           | 0.0330(13)      |
| O11                                                       | 9b         | $C_1$         | -0.2424(15) | 0.0016(14)  | 0.97387(19)  | 1           | 0.0461(15)      |
| O12                                                       | 9b         | $C_1$         | -0.5123(13) | -0.0262(13) | 0.95170(18)  | 1           | 0.0350(14)      |
| O13                                                       | 9b         | $C_1$         | -0.0011(14) | -0.2455(14) | 0.02663(19)  | 1           | 0.0432(14)      |
| O14                                                       | 9b         | $C_1$         | 0.2017(9)   | -0.1990(8)  | 0.13404(11)  | 1           | 0.0133(8)       |
| O15                                                       | 9b         | $C_1$         | -0.1279(9)  | -0.2574(8)  | 0.13218(12)  | 1           | 0.0144(8)       |
| O16                                                       | 9b         | $C_1$         | -0.4669(8)  | -0.5325(8)  | 0.13607(11)  | 1           | 0.0124(8)       |
| $\text{Ba}_2\text{Eu}_3\text{B}_{27-\delta}\text{O}_{46}$ |            |               |             |             |              |             |                 |
| Ba1                                                       | 3a         | $C_3$         | 1.0000      | 1.0000      | 0.92914(5)   | 1           | 0.01412(18)     |
| Ba2                                                       | 3a         | $C_3$         | 1.0000      | 1.0000      | 0.07116(5)   | 1           | 0.01366(17)     |
| Eu1                                                       | 3a         | $C_3$         | 1.0000      | 1.0000      | 0.833765(18) | 1           | 0.00466(13)     |
| Eu2                                                       | 3a         | $C_3$         | 1.0000      | 1.0000      | 0.165295(14) | 1           | 0.00511(18)     |
| Eu3                                                       | 3a         | $C_3$         | 1.0000      | 1.0000      | 0.50128(2)   | 1           | 0.00462(14)     |
| B1                                                        | 9b         | $C_1$         | 1.3371(15)  | 0.9990(15)  | 0.1228(5)    | 1           | 0.0077(11)      |
| B2                                                        | 9b         | $C_1$         | 0.6620(15)  | 0.9999(14)  | 0.1227(5)    | 1           | 0.0073(12)      |
| B3                                                        | 9b         | $C_1$         | 1.0021(15)  | 1.3372(15)  | 0.8772(5)    | 1           | 0.0088(12)      |
| B4                                                        | 9b         | $C_1$         | 1.3354(15)  | 1.3368(15)  | 0.8772(5)    | 1           | 0.0087(12)      |
| B5                                                        | 9b         | $C_1$         | 1.5011(18)  | 1.0016(18)  | 0.0780(2)    | 1           | 0.0122(11)      |
| B6                                                        | 9b         | $C_1$         | 1.0011(18)  | 1.5006(18)  | 0.9227(2)    | 1           | 0.0131(12)      |
| B7                                                        | 9b         | $C_1$         | 1.4172(17)  | 0.9939(18)  | 0.0256(2)    | 1           | 0.0258(14)      |
| B8                                                        | 9b         | $C_1$         | 1.0031(18)  | 1.4217(17)  | 0.9749(2)    | 1           | 0.0252(13)      |
| B9                                                        | 9b         | $C_1$         | 1.1622(19)  | 1.0000      | 0.9999(3)    | 7/9         | 0.0240(15)      |
| O1                                                        | 3a         | $C_3$         | 1.0000      | 1.0000      | 1.0056(2)    | 1           | 0.0155(6)       |
| O2                                                        | 9b         | $C_1$         | 1.0020(11)  | 1.3486(12)  | 0.9084(3)    | 1           | 0.0113(6)       |
| O3                                                        | 9b         | $C_1$         | 0.6526(11)  | 1.0009(11)  | 0.0916(3)    | 1           | 0.0114(6)       |
| O4                                                        | 9b         | $C_1$         | 1.3503(11)  | 1.0023(11)  | 0.0918(3)    | 1           | 0.0110(6)       |
| O5                                                        | 9b         | $C_1$         | 1.3468(12)  | 1.3471(12)  | 0.9086(3)    | 1           | 0.0116(6)       |
| O6                                                        | 9b         | $C_1$         | 1.1346(8)   | 1.2686(8)   | 0.46920(12)  | 1           | 0.0102(6)       |
| O7                                                        | 9b         | $C_1$         | 1.1315(9)   | 0.8693(9)   | 0.13203(12)  | 1           | 0.0123(6)       |
| O8                                                        | 9b         | $C_1$         | 1.5246(10)  | 1.0463(9)   | 0.00000(15)  | 1           | 0.0207(7)       |
| O9                                                        | 9b         | $C_1$         | 1.3960(8)   | 1.1982(8)   | 0.13527(12)  | 1           | 0.0113(6)       |
| O10                                                       | 9b         | $C_1$         | 0.9612(11)  | 1.4821(10)  | 0.95172(15)  | 1           | 0.0192(7)       |
| O11                                                       | 9b         | $C_1$         | 1.2515(11)  | 0.9963(10)  | 0.02567(15)  | 1           | 0.0225(7)       |
| O12                                                       | 9b         | $C_1$         | 1.5150(10)  | 1.0325(11)  | 0.04831(15)  | 1           | 0.0203(7)       |
| O13                                                       | 9b         | $C_1$         | 1.0022(10)  | 1.2536(10)  | 0.97431(14)  | 1           | 0.0213(7)       |
| O14                                                       | 9b         | $C_1$         | 0.8018(8)   | 1.1985(8)   | 0.86586(12)  | 1           | 0.0113(6)       |
| O15                                                       | 9b         | $C_1$         | 1.1301(8)   | 1.2614(9)   | 0.86770(12)  | 1           | 0.0118(6)       |
| O16                                                       | 9b         | $C_1$         | 1.4687(9)   | 1.5308(9)   | 0.86387(12)  | 1           | 0.0117(6)       |

Note:  $U_{\text{eq}}$  is defined as one third of the trace of the orthogonalized  $\mathbf{U}$  tensor.

**Table S2** Selected bond lengths (Å) for Sr<sub>2</sub>Tb<sub>3</sub>B<sub>27-δ</sub>O<sub>46</sub> (δ = 2/3).

|             |           |        |           |
|-------------|-----------|--------|-----------|
| Sr1-O5 × 3  | 2.790(8)  | B3-O16 | 1.475(15) |
| Sr1-O2 × 3  | 2.798(7)  | B3-O14 | 1.481(14) |
| Sr1-O13 × 3 | 2.906(10) | Mean   | 1.471     |
| Mean        | 2.831     | B4-O16 | 1.463(15) |
| Sr2-O3 × 3  | 2.794(8)  | B4-O5  | 1.464(29) |
| Sr2-O4 × 3  | 2.810(7)  | B4-O14 | 1.473(14) |
| Sr2-O11 × 3 | 2.916(10) | B4-O15 | 1.478(13) |
| Mean        | 2.840     | Mean   | 1.470     |
| Tb1-O9 × 3  | 2.332(5)  | B5-O4  | 1.334(13) |
| Tb1-O15 × 3 | 2.343(6)  | B5-O3  | 1.366(14) |
| Mean        | 2.338     | B5-O12 | 1.385(11) |
| Tb2-O7 × 3  | 2.320(5)  | Mean   | 1.362     |
| Tb2-O16 × 3 | 2.324(5)  | B6-O2  | 1.345(14) |
| Mean        | 2.322     | B6-O5  | 1.363(14) |
| Tb3-O14 × 3 | 2.305(5)  | B6-O10 | 1.384(12) |
| Tb3-O6 × 3  | 2.312(5)  | Mean   | 1.364     |
| Mean        | 2.309     | B7-O11 | 1.246(19) |
| B1-O4       | 1.451(28) | B7-O12 | 1.283(15) |
| B1-O7       | 1.457(12) | B7-O8  | 1.490(15) |
| B1-O6       | 1.475(13) | Mean   | 1.340     |
| B1-O9       | 1.487(14) | B8-O13 | 1.248(18) |
| Mean        | 1.468     | B8-O10 | 1.302(15) |
| B2-O3       | 1.454(29) | B8-O8  | 1.475(16) |
| B2-O6       | 1.471(14) | Mean   | 1.342     |
| B2-O9       | 1.473(14) | B9-O1  | 1.204(17) |
| B2-O7       | 1.490(12) | B9-O13 | 1.399(18) |
| Mean        | 1.472     | B9-O11 | 1.464(18) |
| B3-O2       | 1.464(31) | Mean   | 1.356     |
| B3-O15      | 1.465(13) |        |           |

**Table S3** Selected bond angles (°) for Sr<sub>2</sub>Tb<sub>3</sub>B<sub>27-δ</sub>O<sub>46</sub> (δ = 2/3).

|                 |            |            |           |
|-----------------|------------|------------|-----------|
| O9-Tb1-O9 × 3   | 84.04(19)  | O2-B3-O16  | 111.6(11) |
| O9-Tb1-O15 × 3  | 81.91(19)  | O2-B3-O14  | 111.6(12) |
| O9-Tb1-O15 × 3  | 135.39(18) | O15-B3-O14 | 106.6(11) |
| O9-Tb1-O15 × 3  | 135.68(19) | O16-B3-O14 | 106.9(12) |
| O15-Tb1-O15 × 3 | 79.3(2)    | O15-B3-O16 | 110.9(12) |
|                 |            | Mean       | 109.5     |
| O7-Tb2-O7 × 3   | 80.3(2)    | O5-B4-O15  | 109.3(12) |
| O7-Tb2-O16 × 3  | 81.26(19)  | O5-B4-O14  | 110.9(11) |
| O7-Tb2-O16 × 3  | 135.1(2)   | O16-B4-O14 | 106.4(12) |
| O7-Tb2-O16 × 3  | 135.6(2)   | O16-B4-O15 | 111.0(12) |
| O16-Tb2-O16 × 3 | 84.0(2)    | O16-B4-O5  | 112.8(11) |
|                 |            | O14-B4-O15 | 106.2(11) |
|                 |            | Mean       | 109.4     |
| O14-Tb3-O14 × 3 | 84.2(2)    | O3-B5-O12  | 117.0(10) |
| O14-Tb3-O6 × 3  | 78.99(19)  | O4-B5-O12  | 118.4(10) |
| O14-Tb3-O6 × 3  | 134.4(2)   | O4-B5-O3   | 123.9(10) |
| O14-Tb3-O6 × 3  | 134.8(2)   | Mean       | 119.8     |
| O6-Tb3-O6 × 3   | 83.6(2)    | O2-B6-O10  | 119.0(11) |
|                 |            | O2-B6-O5   | 123.8(11) |
| O4-B1-O7        | 110.0(11)  | O5-B6-O10  | 116.2(10) |
| O4-B1-O6        | 111.4(10)  | Mean       | 119.7     |
| O4-B1-O9        | 112.3(10)  | O11-B7-O8  | 119.6(11) |
| O6-B1-O9        | 106.8(11)  | O11-B7-O12 | 124.8(12) |
| O7-B1-O6        | 110.8(11)  | O12-B7-O8  | 107.7(11) |
| O7-B1-O9        | 105.4(10)  | Mean       | 117.4     |
| Mean            | 109.5      | O10-B8-O8  | 107.1(11) |
| O3-B2-O7        | 108.5(11)  | O13-B8-O8  | 121.0(11) |
| O3-B2-O6        | 112.2(10)  | O13-B8-O10 | 122.4(11) |
| O3-B2-O9        | 113.0(10)  | Mean       | 116.8     |
| O6-B2-O9        | 107.6(12)  | O1-B9-O11  | 102.6(12) |
| O6-B2-O7        | 109.8(11)  | O1-B9-O13  | 140.0(15) |
| O9-B2-O7        | 105.5(10)  | O13-B9-O11 | 117.3(13) |
| Mean            | 109.4      | Mean       | 120.0     |
| O2-B3-O15       | 109.2(12)  |            |           |

**Table S4** Selected bond lengths (Å) for Ba<sub>2</sub>Eu<sub>3</sub>B<sub>27-δ</sub>O<sub>46</sub> (δ = 2/3).

|             |           |        |           |
|-------------|-----------|--------|-----------|
| Ba1-O5 × 3  | 2.868(9)  | B3-O15 | 1.459(13) |
| Ba1-O2 × 3  | 2.877(9)  | B3-O16 | 1.478(14) |
| Ba1-O13 × 3 | 2.879(7)  | B3-O14 | 1.482(14) |
| Mean        | 2.875     | Mean   | 1.469     |
| Ba2-O3 × 3  | 2.874(8)  | B4-O5  | 1.464(24) |
| Ba2-O4 × 3  | 2.887(8)  | B4-O15 | 1.470(13) |
| Ba2-O11 × 3 | 2.894(7)  | B4-O16 | 1.476(14) |
| Ba2-O1      | 3.051(10) | B4-O14 | 1.480(14) |
| Mean        | 2.902     | Mean   | 1.473     |
| Eu1-O9 × 3  | 2.352(6)  | B5-O4  | 1.341(14) |
| Eu1-O15 × 3 | 2.368(6)  | B5-O3  | 1.342(14) |
| Mean        | 2.360     | B5-O12 | 1.398(11) |
| Eu2-O7 × 3  | 2.351(6)  | Mean   | 1.360     |
| Eu2-O16 × 3 | 2.357(6)  | B6-O5  | 1.361(14) |
| Mean        | 2.354     | B6-O2  | 1.362(14) |
| Eu3-O14 × 3 | 2.331(6)  | B6-O10 | 1.376(11) |
| Eu3-O6 × 3  | 2.348(6)  | Mean   | 1.366     |
| Mean        | 2.340     | B7-O12 | 1.250(13) |
| B1-O4       | 1.442(24) | B7-O11 | 1.301(15) |
| B1-O7       | 1.468(13) | B7-O8  | 1.392(13) |
| B1-O6       | 1.472(14) | Mean   | 1.314     |
| B1-O9       | 1.500(14) | B8-O10 | 1.282(13) |
| Mean        | 1.471     | B8-O13 | 1.307(15) |
| B2-O3       | 1.449(24) | B8-O8  | 1.371(13) |
| B2-O6       | 1.468(14) | Mean   | 1.320     |
| B2-O7       | 1.481(13) | B9-O1  | 1.292(15) |
| B2-O9       | 1.492(14) | B9-O13 | 1.381(16) |
| Mean        | 1.473     | B9-O11 | 1.395(16) |
| B3-O2       | 1.455(25) | Mean   | 1.356     |

**Table S5** Selected bond angles (°) for Ba<sub>2</sub>Eu<sub>3</sub>B<sub>27-δ</sub>O<sub>46</sub> (δ = 2/3).

|                 |           |            |           |
|-----------------|-----------|------------|-----------|
| O9-Eu1-O9 × 3   | 84.6(2)   | O2-B3-O16  | 111.4(10) |
| O9-Eu1-O15 × 3  | 80.8(2)   | O2-B3-O14  | 111.5(11) |
| O9-Eu1-O15 × 3  | 135.0(2)  | O15-B3-O14 | 106.4(10) |
| O9-Eu1-O15 × 3  | 135.3(2)  | O15-B3-O16 | 110.9(11) |
| O15-Eu1-O15 × 3 | 80.4(2)   | O16-B3-O14 | 106.0(11) |
|                 |           | Mean       | 109.4     |
| O7-Eu2-O7 × 3   | 81.4(2)   | O5-B4-O15  | 110.2(11) |
| O7-Eu2-O16 × 3  | 80.2(2)   | O5-B4-O14  | 111.3(10) |
| O7-Eu2-O16 × 3  | 134.9(2)  | O5-B4-O16  | 111.7(11) |
| O7-Eu2-O16 × 3  | 135.1(2)  | O15-B4-O14 | 106.6(10) |
| O16-Eu2-O16 × 3 | 84.6(2)   | O15-B4-O16 | 110.6(10) |
|                 |           | O16-B4-O14 | 106.3(11) |
|                 |           | Mean       | 109.5     |
| O14-Eu3-O14 × 3 | 85.2(2)   | O4-B5-O12  | 117.7(10) |
| O14-Eu3-O6 × 3  | 78.0(2)   | O4-B5-O3   | 123.4(10) |
| O14-Eu3-O6 × 3  | 134.2(2)  | O3-B5-O12  | 118.3(10) |
| O14-Eu3-O6 × 3  | 134.3(2)  | Mean       | 119.8     |
| O6-Eu3-O6 × 3   | 84.0(2)   | O5-B6-O10  | 117.7(10) |
|                 |           | O5-B6-O2   | 122.0(10) |
| O4-B1-O7        | 110.4(11) | O2-B6-O10  | 119.1(10) |
| O4-B1-O6        | 111.3(10) | Mean       | 119.6     |
| O4-B1-O9        | 112.8(10) | O12-B7-O8  | 116.5(10) |
| O7-B1-O9        | 105.3(10) | O12-B7-O11 | 118.9(10) |
| O7-B1-O6        | 110.3(11) | O11-B7-O8  | 117.1(10) |
| O6-B1-O9        | 106.5(11) | Mean       | 117.5     |
| Mean            | 109.4     | O10-B8-O8  | 115.7(11) |
| O3-B2-O7        | 109.5(10) | O10-B8-O13 | 118.5(9)  |
| O3-B2-O6        | 111.8(10) | O13-B8-O8  | 118.6(10) |
| O3-B2-O9        | 113.5(10) | Mean       | 117.6     |
| O6-B2-O9        | 106.7(11) | O1-B9-O11  | 108.8(11) |
| O6-B2-O7        | 109.8(10) | O1-B9-O13  | 132.5(13) |
| O7-B2-O9        | 105.2(10) | O13-B9-O11 | 118.7(12) |
| Mean            | 109.4     | Mean       | 120       |
| O2-B3-O15       | 110.4(11) |            |           |

**Table S6** SHG intensities of the  $\text{Sr}_2\text{Tb}_3\text{B}_{27-\delta}\text{O}_{46}$  and  $\text{Ba}_2\text{Eu}_3\text{B}_{27-\delta}\text{O}_{46}$  ( $\delta = 2/3$ ) samples compared with the KDP reference.

| Sample name           | KDP                   |                        | $\text{Sr}_2\text{Tb}_3\text{B}_{27-\delta}\text{O}_{46}$ |                        | $\text{Ba}_2\text{Eu}_3\text{B}_{27-\delta}\text{O}_{46}$ |                        |     |
|-----------------------|-----------------------|------------------------|-----------------------------------------------------------|------------------------|-----------------------------------------------------------|------------------------|-----|
|                       | $I_{\text{observed}}$ | $I_{\text{corrected}}$ | $I_{\text{observed}}$                                     | $I_{\text{corrected}}$ | $I_{\text{observed}}$                                     | $I_{\text{corrected}}$ |     |
|                       | 1                     | 388                    | 408                                                       | 371                    | 391                                                       | 203                    | 223 |
|                       | 2                     | 418                    | 438                                                       | 333                    | 353                                                       | 193                    | 213 |
|                       | 3                     | 413                    | 433                                                       | 324                    | 344                                                       | 215                    | 235 |
|                       | 4                     | 367                    | 387                                                       | 395                    | 415                                                       | 210                    | 230 |
| Measurement<br>number | 5                     | 473                    | 493                                                       | 383                    | 403                                                       | 220                    | 240 |
|                       | 6                     | 454                    | 474                                                       | 373                    | 393                                                       | 200                    | 220 |
|                       | 7                     | 392                    | 412                                                       | 376                    | 396                                                       | 176                    | 196 |
|                       | 8                     | 386                    | 406                                                       |                        |                                                           | 189                    | 209 |
|                       | 9                     |                        |                                                           |                        |                                                           | 243                    | 263 |
|                       | 10                    |                        |                                                           |                        |                                                           | 171                    | 191 |
| Average SHG intensity |                       | 431.375                |                                                           | 385                    |                                                           | 222                    |     |

Note: Background counts is -20,  $I_{\text{observed}}$  is the observed SHG intensity in counts,  $I_{\text{corrected}} = I_{\text{observed}} - \text{Background}$ , and it is the SHG intensity after correction. The KDP,  $\text{Sr}_2\text{Tb}_3\text{B}_{27-\delta}\text{O}_{46}$  and  $\text{Ba}_2\text{Eu}_3\text{B}_{27-\delta}\text{O}_{46}$  samples were each repeatedly measured 8, 7 and 10 times, respectively, and the average SHG intensity was used for comparison.

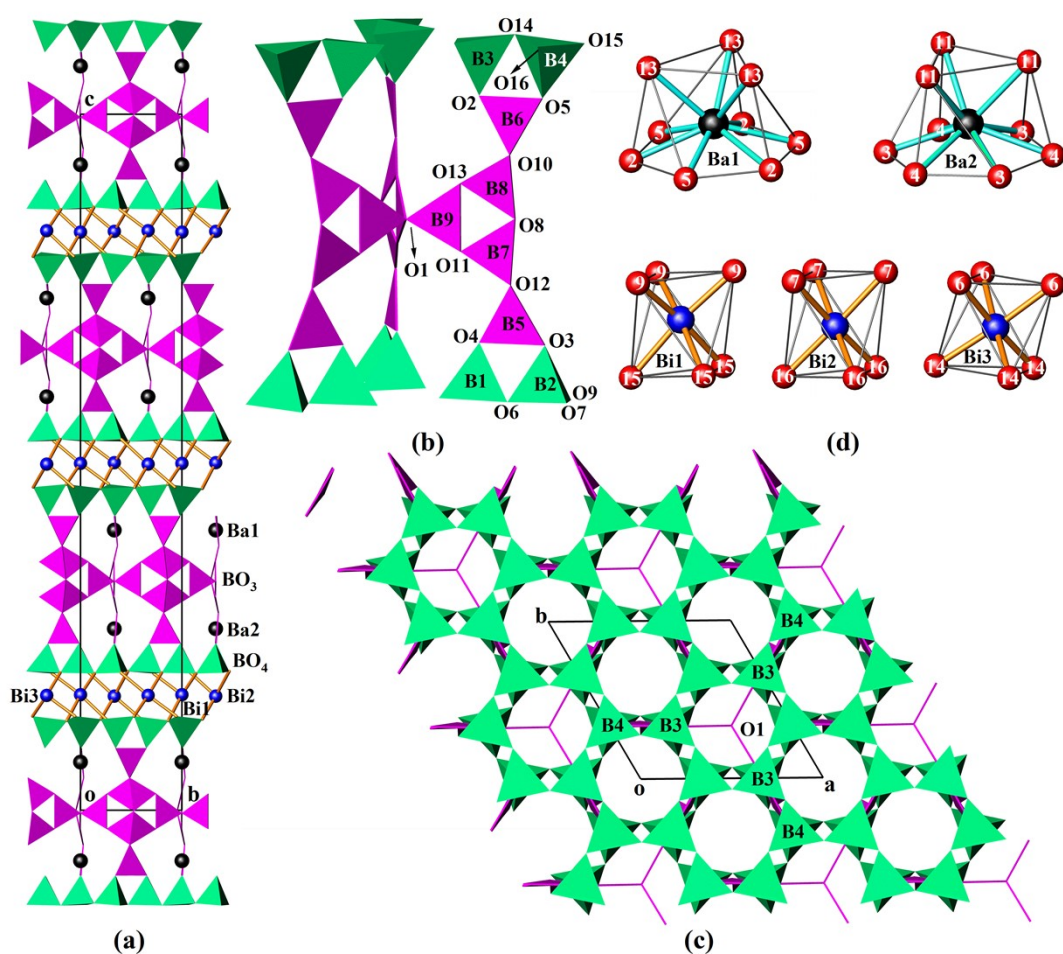

**Fig. S1** Crystal structure of  $\text{Ba}_6\text{Bi}_9\text{B}_{79}\text{O}_{138}$  projected along the  $[100]$  direction (a), the  $[\text{B}_{27}\text{O}_{58}]^{35-}$  polyborate anionic group (b), a single layer  $[\text{B}_{27}\text{O}_{46}]_n^{11n-}$  viewed along the  $[001]$  direction (c), and the local environment of each  $\text{Ba}^{2+}$  and  $\text{Bi}^{3+}$  site (the numbers correspond to the oxygen atom designations) (d). Ba: black balls; Bi: blue balls;  $\text{BO}_3$ : magenta triangles;  $\text{BO}_4$ : green tetrahedra. Note: the structural data of  $\text{Ba}_6\text{Bi}_9\text{B}_{79}\text{O}_{138}$  are taken from ref.28; the crystal structure of  $\text{Ba}_6\text{Bi}_9\text{B}_{79}\text{O}_{138}$  is plotted in the same way as that of  $\text{Sr}_2\text{Tb}_3\text{B}_{27-8}\text{O}_{46}$ , and the atom designations and the plot orientation of these two structures remain the same for the convenience of the structural comparison.



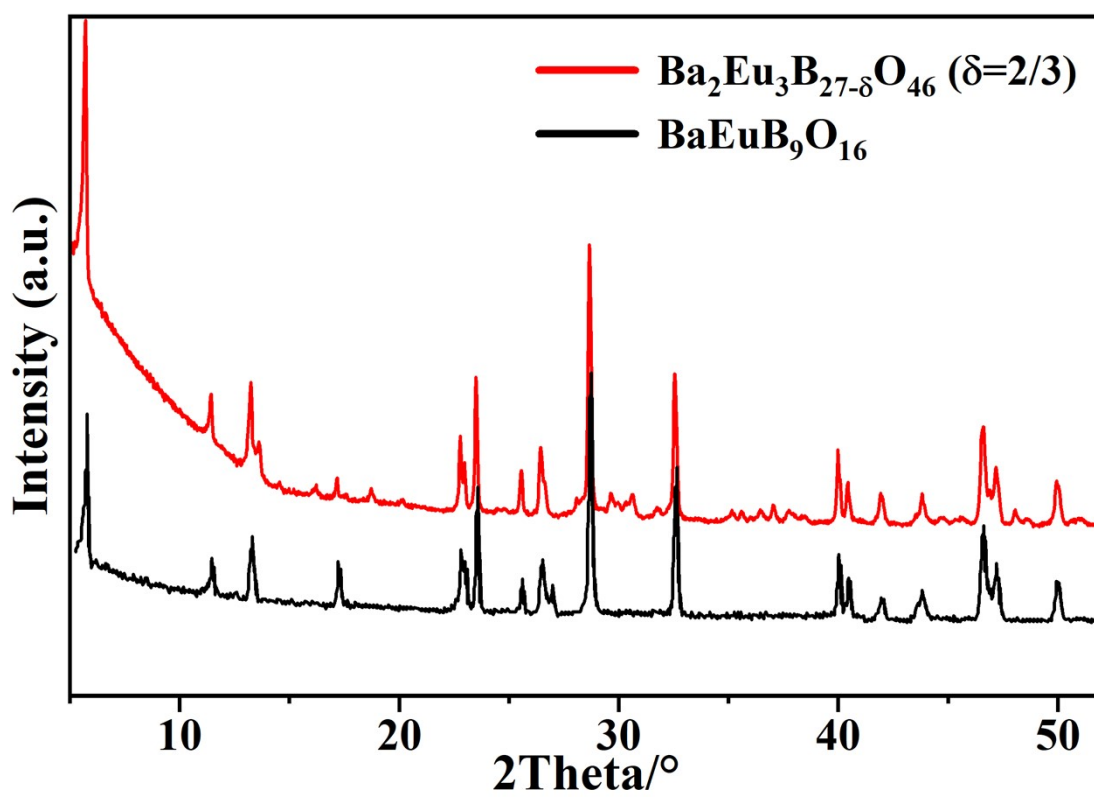

**Fig. S2** Comparison of the observed XRD pattern of  $\text{Ba}_2\text{Eu}_3\text{B}_{27-\delta}\text{O}_{46}$  ( $\delta = 2/3$ ) (presented in this work) with that of “ $\text{BaEuB}_9\text{O}_{16}$ ” (cited from ref. 21).

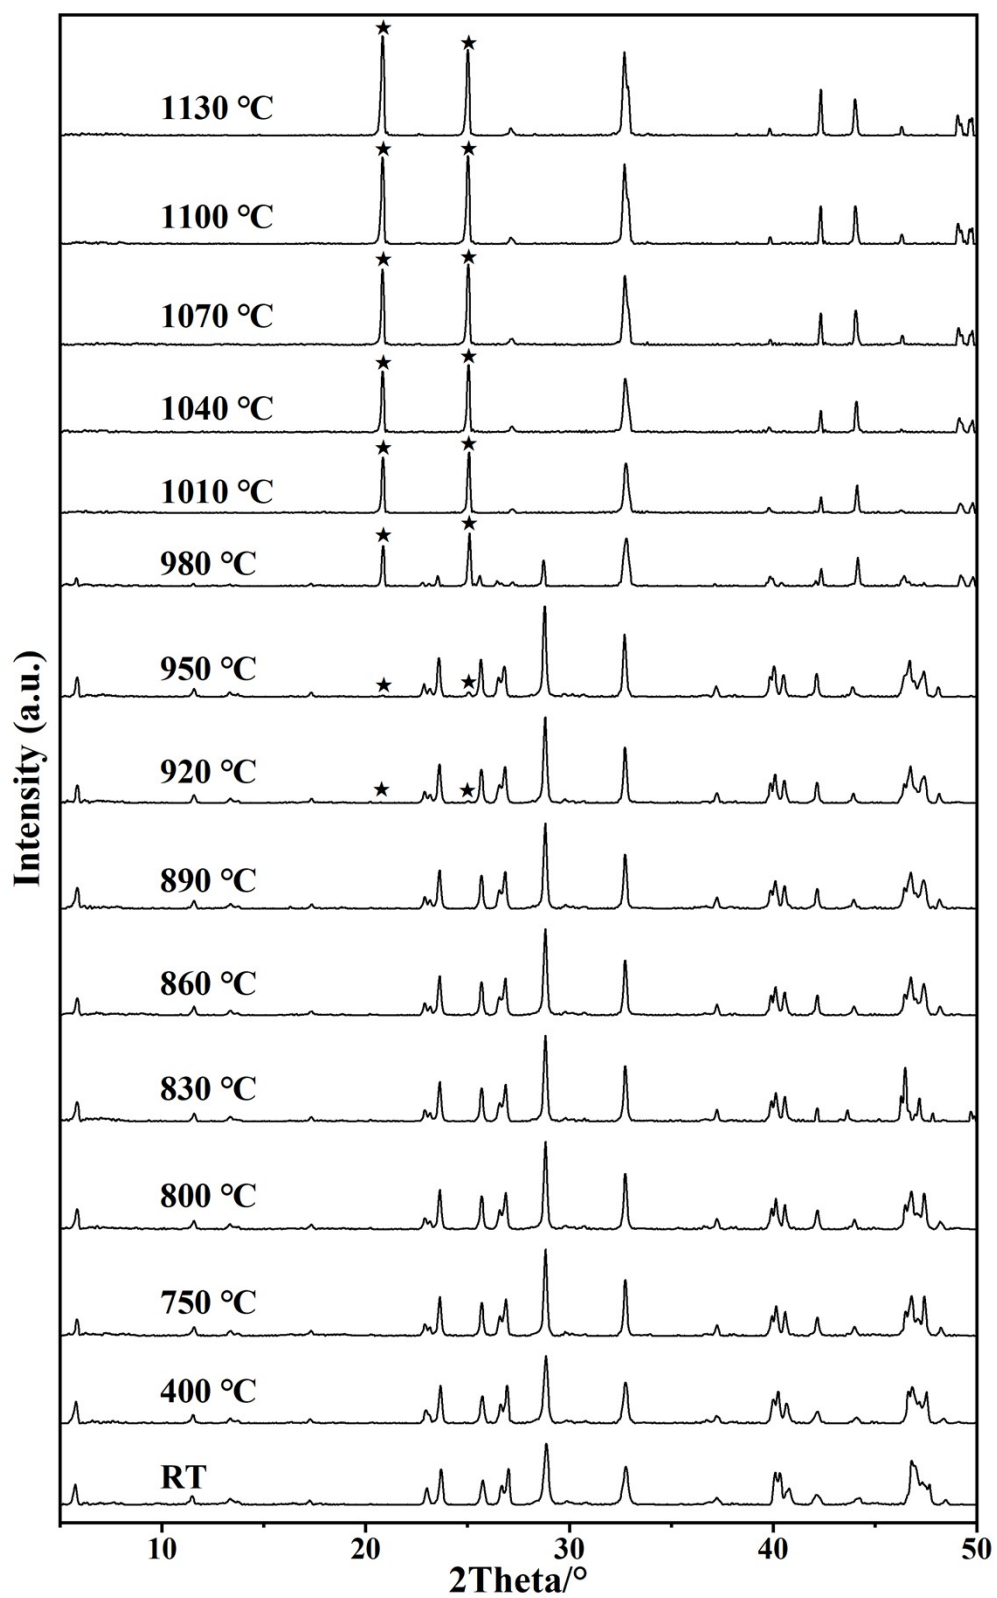

**Fig. S3** XRD patterns of  $\text{Sr}_2\text{Tb}_3\text{B}_{27-\delta}\text{O}_{46}$  ( $\delta = 2/3$ ) under different temperatures. ★: an unknown phase.

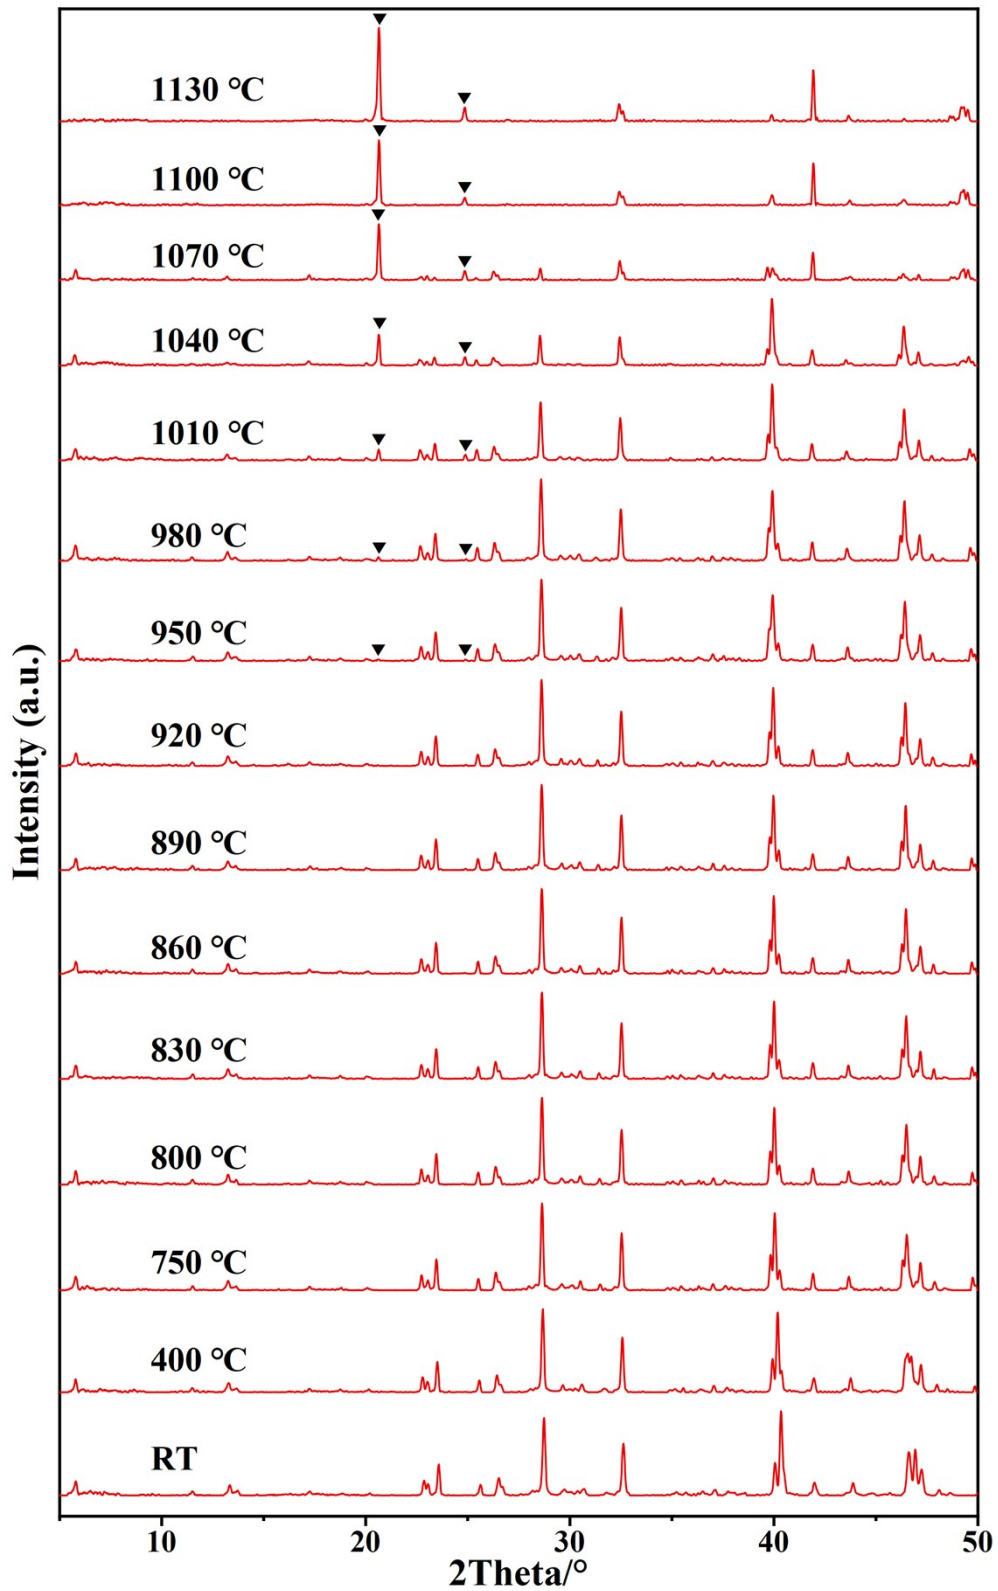

**Fig. S4** XRD patterns of  $\text{Ba}_2\text{Eu}_3\text{B}_{27-\delta}\text{O}_{46}$  ( $\delta = 2/3$ ) under different temperatures. ▼ :  $\text{EuBO}_3$  (PDF 89-7888).

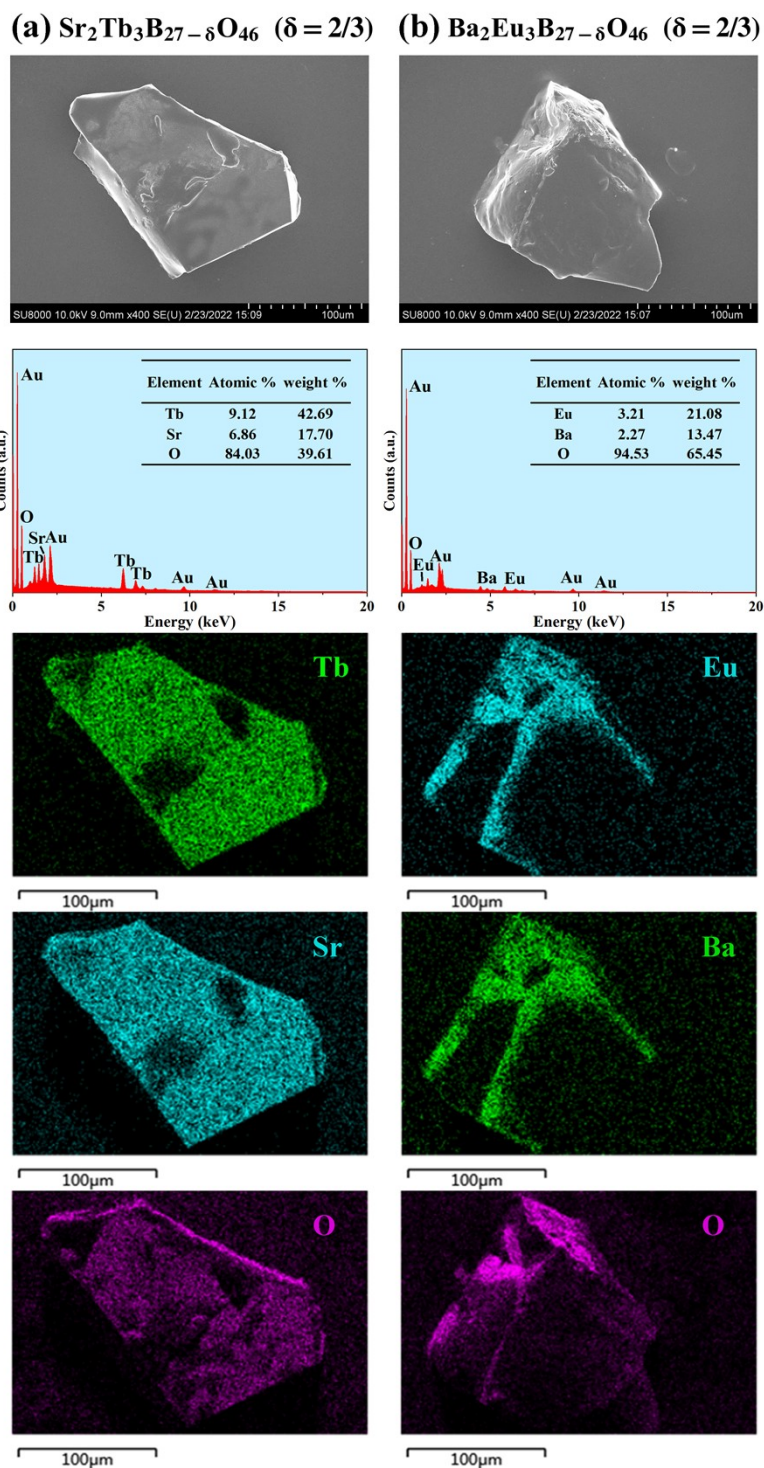

**Fig. S5** FE-SEM images, typical EDX spectra, and elemental mapping of the  $\text{Sr}_2\text{Tb}_3\text{B}_{27-\delta}\text{O}_{46}$  (a) and  $\text{Ba}_2\text{Eu}_3\text{B}_{27-\delta}\text{O}_{46}$  (b) crystals. Au element comes from the pretreatment process. Note: The single crystal displayed in (b) has a size suitable for the crystal structure determination, which was cut from a big and thick  $\text{Ba}_2\text{Eu}_3\text{B}_{27-\delta}\text{O}_{46}$  ( $\delta = 2/3$ ) plate.

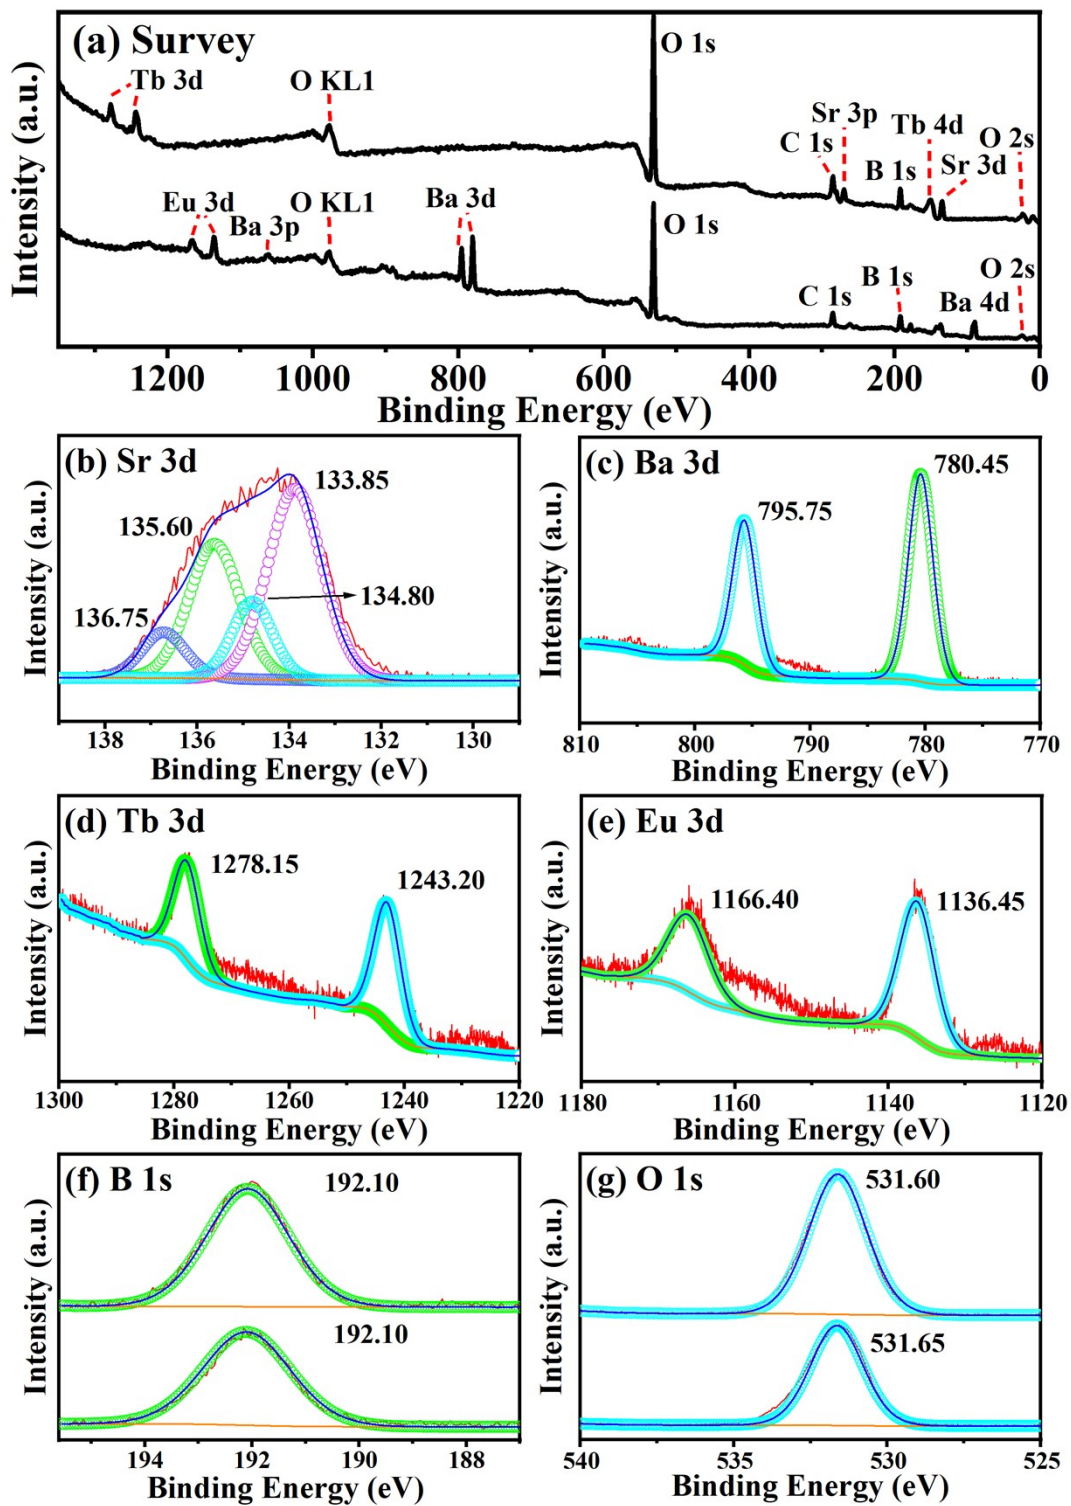

**Fig. S6** Survey (a) and core-level spectra of Sr 3d (b), Ba 3d (c), Tb 3d (d), Eu 3d (e)

B 1s (f), and O 1s (g) for  $\text{Sr}_2\text{Tb}_3\text{B}_{27-\delta}\text{O}_{46}$  (top) and  $\text{Ba}_2\text{Eu}_3\text{B}_{27-\delta}\text{O}_{46}$  (bottom).
